# Supplementary material for: Benzothiazole DNA gyrase inhibitors and their conjugates with siderophore mimics: design, synthesis and evaluation
Source: Royal Society of Chemistry journal article supplement (doi:10.1039/d3ra08337c), 2024-01-01

SUPPORTING INFORMATION

**Benzothiazole DNA gyrase inhibitors and their conjugates with siderophore mimics:**

**Design, synthesis and evaluation**

Martina Durcik,<sup>a</sup> Cristina D. Cruz,<sup>b</sup> Mariano Andrea Scorciapino,<sup>c</sup> Janez Ilaš,<sup>a</sup> Päivi Tammela,<sup>b</sup>  
Matteo Ceccarelli,<sup>d</sup> Lucija Peterlin Mašič<sup>a</sup> and Tihomir Tomašič,<sup>a,\*</sup>

<sup>a</sup>*University of Ljubljana, Faculty of Pharmacy, Aškerčeva cesta 7, 1000 Ljubljana, Slovenia*

<sup>b</sup>*Drug Research Program, Division of Pharmaceutical Biosciences, Faculty of Pharmacy,  
University of Helsinki, P.O. Box 56 (Viikinkaari 5 E), FI-00014 Helsinki, Finland*

<sup>c</sup>*Department of Chemical and Geological Sciences, University of Cagliari, Cittadella  
Universitaria di Monserrato – S.P. 8 km 0.700, 09042 - Monserrato (CA), Italy*

<sup>d</sup>*Department of Physics and IOM/CNR, Sezione di Cagliari, University of Cagliari, Cittadella  
Universitaria di Monserrato – S.P. 8 km 0700, 09042 - Monserrato (CA), Italy*

**\*Corresponding author: Tihomir Tomašič**

University of Ljubljana, Faculty of Pharmacy,

Aškerčeva cesta 7, 1000 Ljubljana, Slovenia

Tel: +386-1-4769556

E-mail: [tihomir.tomasic@ffa.uni-lj.si](mailto:tihomir.tomasic@ffa.uni-lj.si)

## Representative analytical data (NMR spectra, HRMS spectra, HPLC chromatograms)

$^1\text{H}$  NMR spectrum of 2-(4,5-dibromo-1*H*-pyrrole-2-carboxamido)-*N*-((5-hydroxy-4-oxo-4*H*-pyran-2-yl)methyl)benzo[*d*]thiazole-6-carboxamide (**10**).

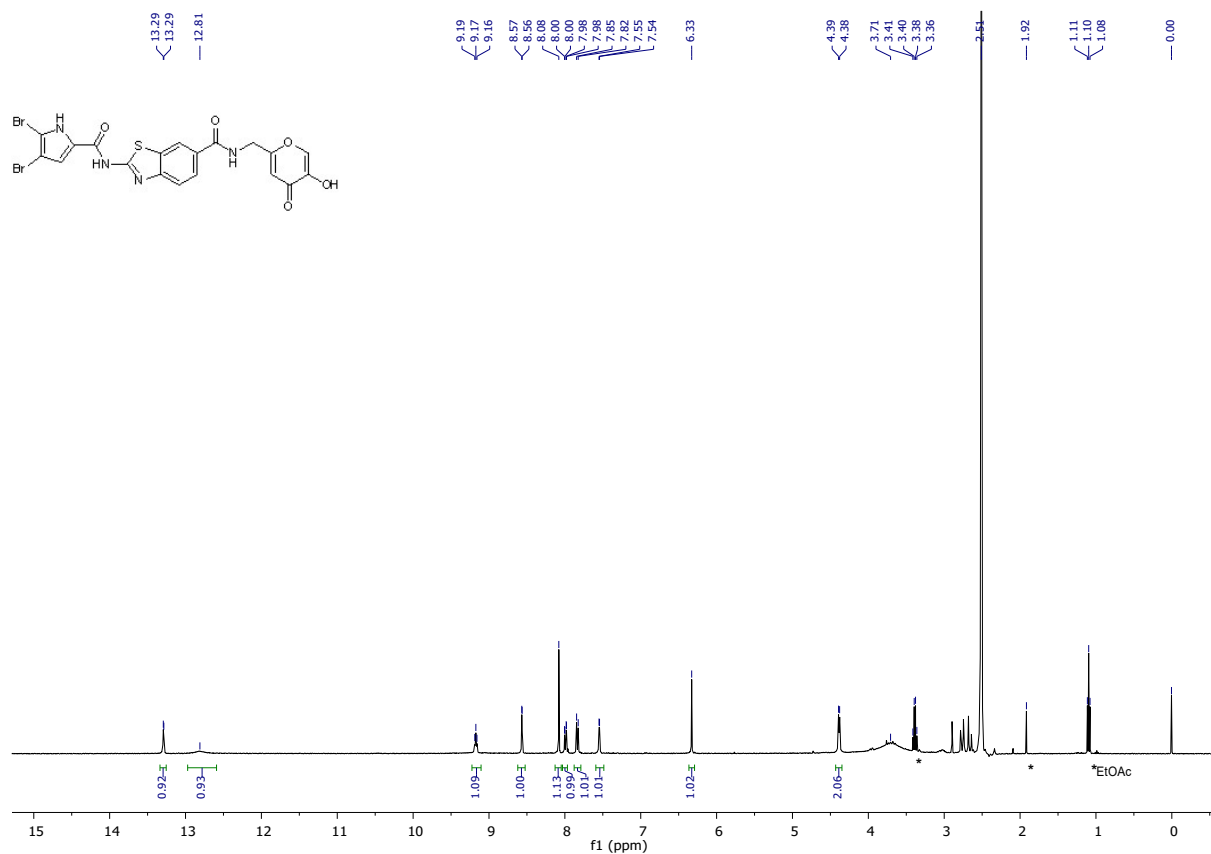

$^1\text{H}$  and  $^{13}\text{C}$  NMR spectrum of 2-(4,5-dibromo-1*H*-pyrrole-2-carboxamido)-*N*-((5-hydroxy-4-oxo-1,4-dihydropyridin-2-yl)methyl)benzo[*d*]thiazole-6-carboxamide (**12**).

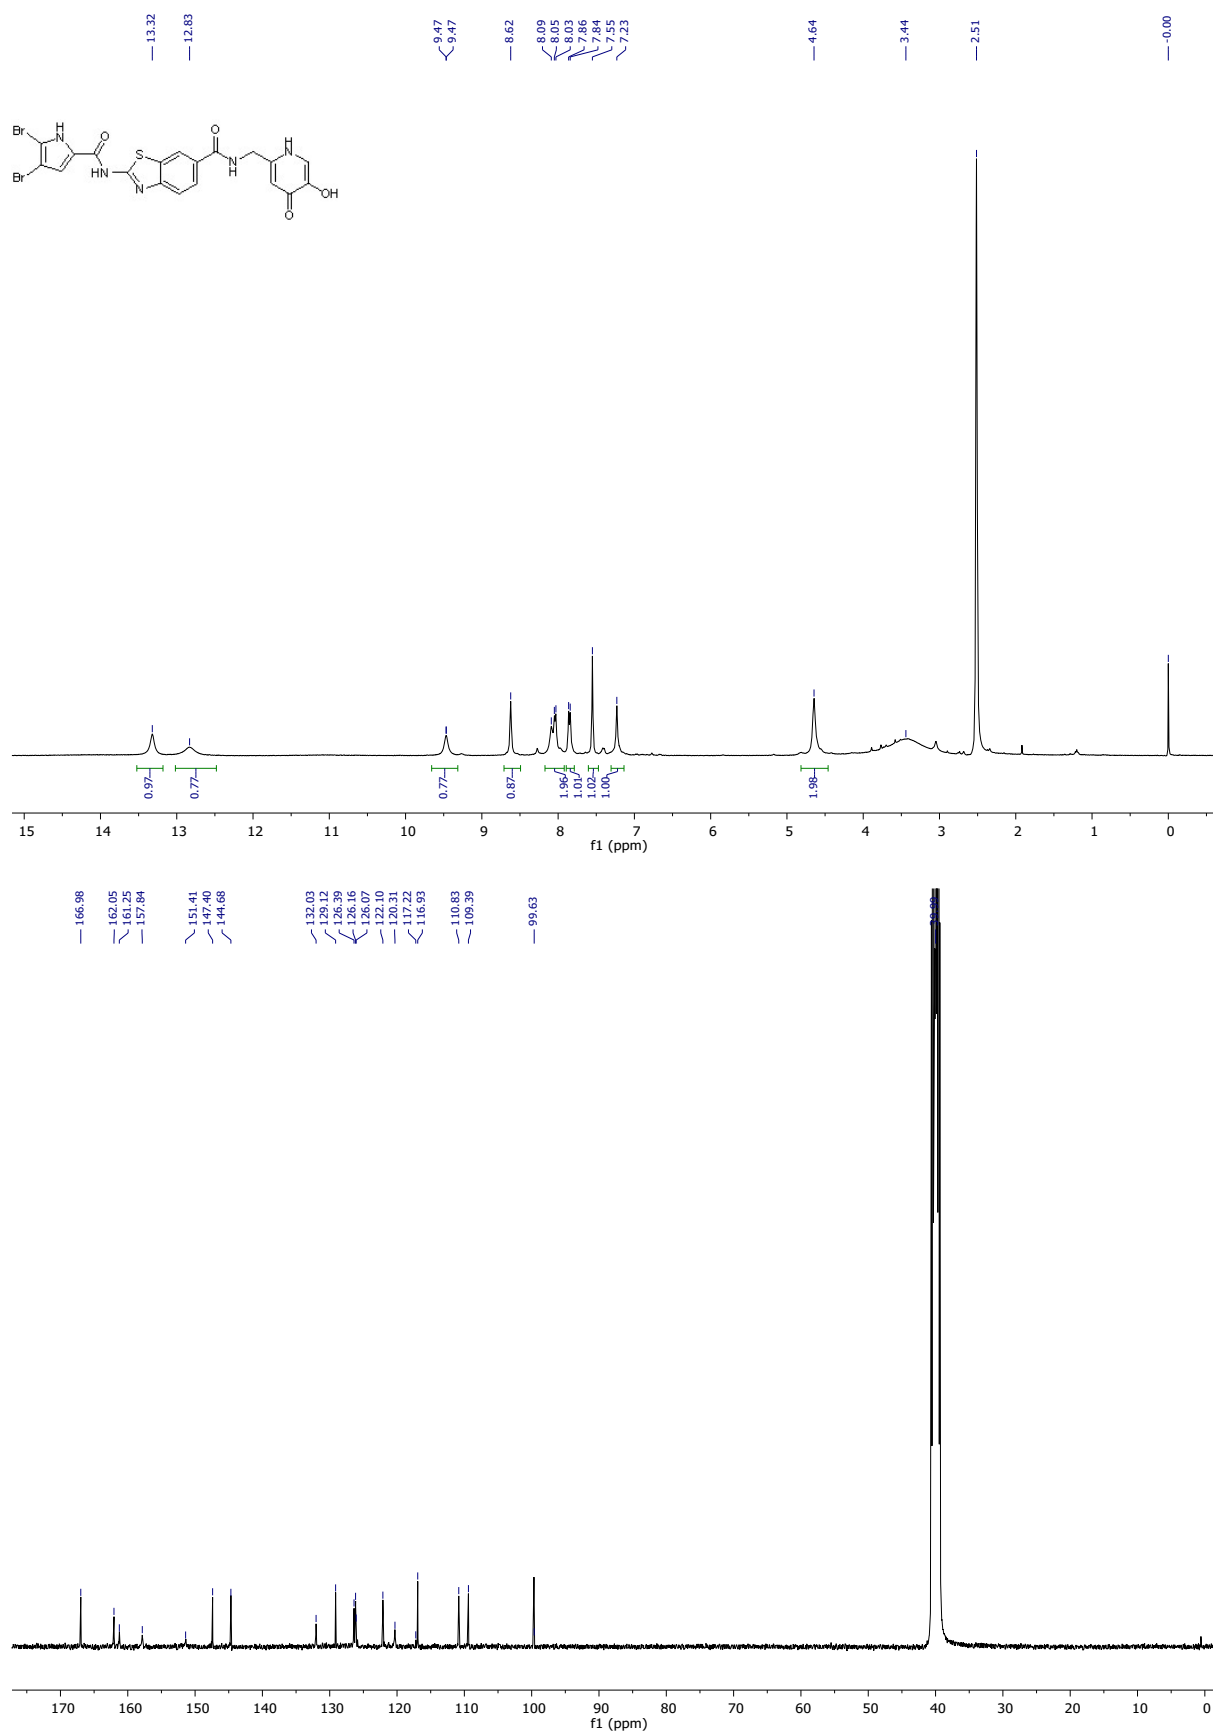

$^1\text{H}$  NMR spectrum of 2-(4,5-dibromo-1*H*-pyrrole-2-carboxamido)-4-((5-hydroxy-4-oxo-1,4-dihydropyridin-2-yl)methoxy)benzo[*d*]thiazole-6-carboxylic acid (**18a**).

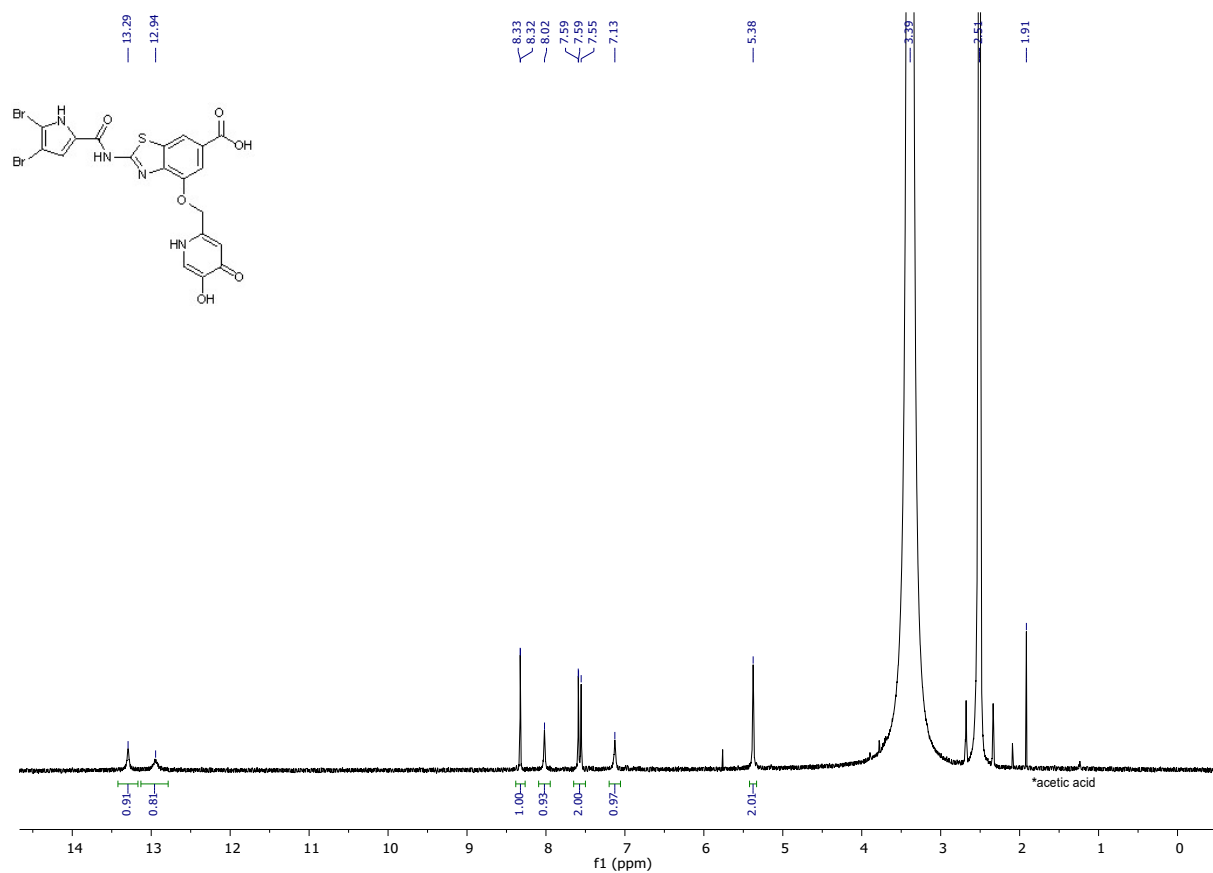

$^1\text{H}$  NMR spectrum of 2-(3,4-dichloro-5-methyl-1*H*-pyrrole-2-carboxamido)-4-((5-hydroxy-4-oxo-1,4-dihydropyridin-2-yl)methoxy)benzo[*d*]thiazole-6-carboxylic acid (**18b**).

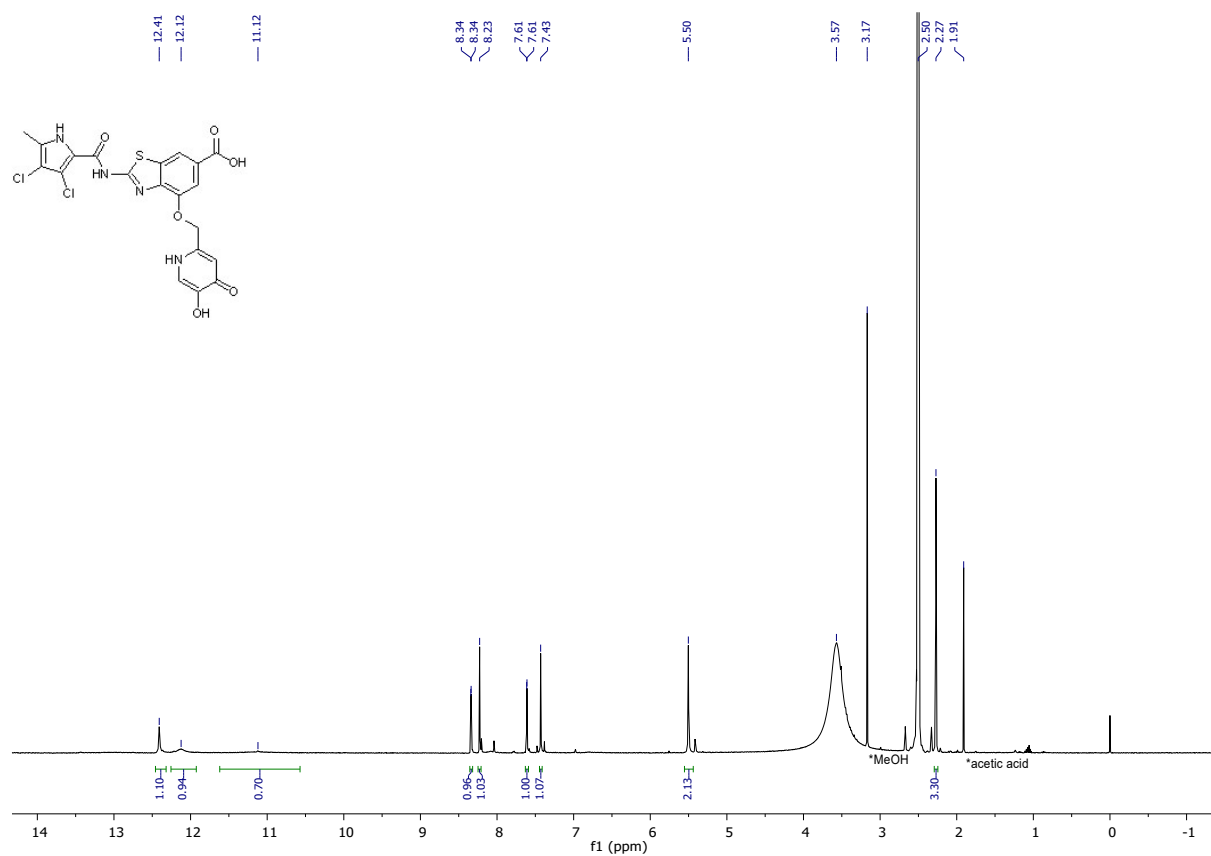

HRMS data for compound **18a**.

TGM-53  
 TGM-53 #45-46 RT: 0.20-0.20 AV: 2 NL: 7.31E6  
 T: FTMS - c ESI Full ms [150.0000-2000.0000]

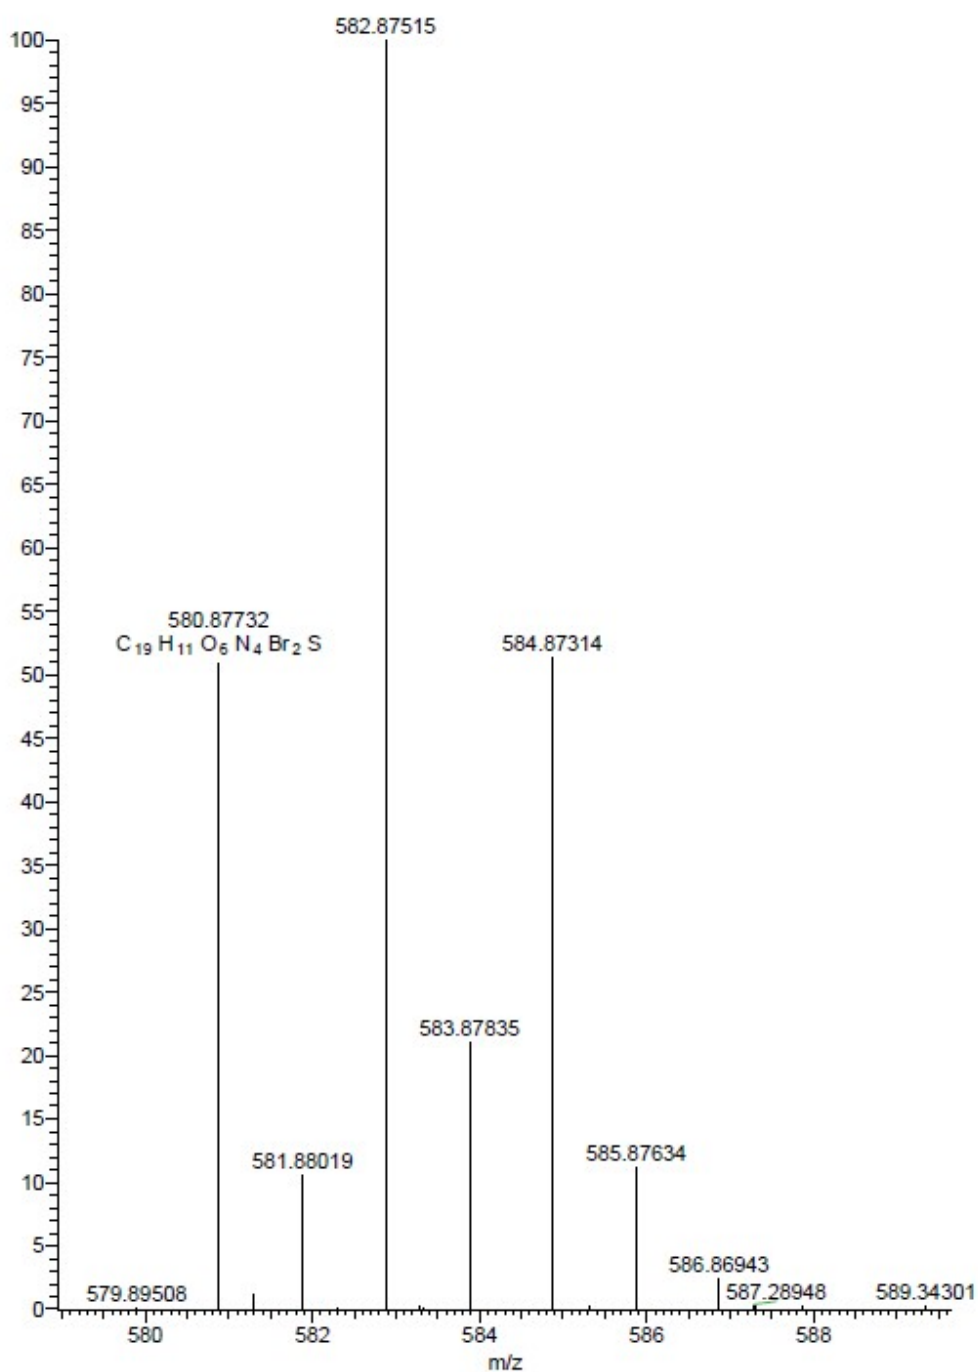

Elemental composition search on mass 580.87732

m/z= 575.87732-585.87732

| m/z       | Theo. Mass | Delta (ppm) | RDB equiv. | Composition                                                                     |
|-----------|------------|-------------|------------|---------------------------------------------------------------------------------|
| 580.87732 | 580.87715  | 0.29        | 15.5       | C <sub>19</sub> H <sub>11</sub> O <sub>6</sub> N <sub>4</sub> Br <sub>2</sub> S |

### HPLC traces for compound **18a**.

VWD: Signal A, 254 nm  
tgm-53\_UV.datx 2022.11.24 12:56:13;

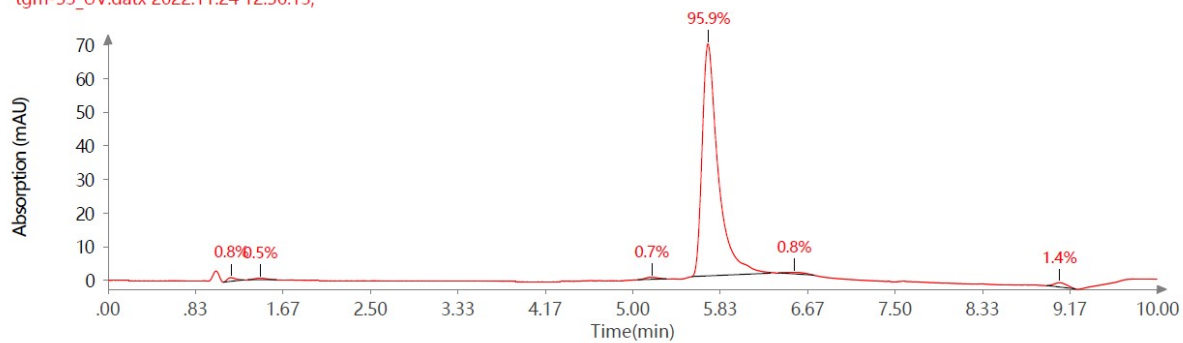

### HPLC traces for compound **18b**.

VWD: Signal A, 254 nm  
LMD-266-iz\_meoh\_UV.datx 2020.01.13 10:20:35;

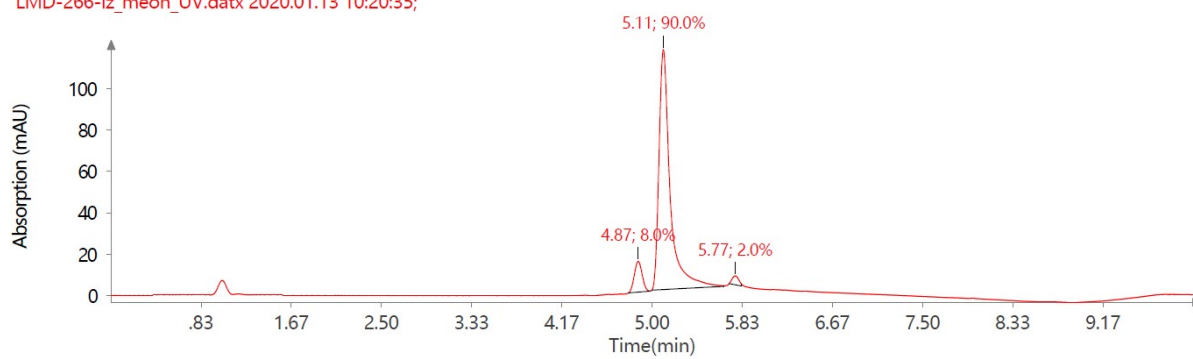

Supplement: d3ra08337c1.pdf [file d3ra08337c1.pdf]
